## P1491

**Cardiac contractility modulation in patients with chronic heart failure and atrial fibrillation: 6 months of follow-up**

Sapelnikov O.; Uskach TM.; Cherkashin DI.; Grishin IR.; Ardus DF.; Nikolaeva OA.; Safiullina AA.; Merzlikina JO.; Tereschenko SN.; Akchurin RS.

Cardiology Research and Production Center, Cardiovascular surgery, Moscow, Russian Federation

**Background:** Heart failure is developed in 30% of patients with atrial fibrillation (AF). It significantly worsens the prognosis and evaluates the fatal risks for patients. Cardiac Contractility Modulation (CCM) is a new therapeutic device for heart failure, which is used in patients with narrow QRS complexes who are refractory to medical therapy.

**Purpose:** The aim of current study is to demonstrate the effects of CCM on patients with heart failure and AF, influencing on NT-proBNP dynamics and 6 min walk test (6-MWT).

**Methods:** Forty patients (40) with symptomatic heart failure (II-III NYHA class), persistent/paroxysmal AF and reduced left ventricular ejection fraction (LVEF  $\leq 40\%$ ) were included. The average age was  $60 \pm 6$  years. Mean LA-volume was  $120 \pm 22$  ml and NT-proBNP level was  $1336 \pm 278$  pg/ml. A 6-MWT was  $246 \pm 33$  m. All patients were implanted with a CCM Optimizer according to the protocol of implantation without an atrial lead. The study compared the mean state changes from baseline to 6 months' follow-up.

**Results:** In 6 months' follow-up we observed a significant improvement in functional and symptomatic parameters. NT-proBNP level was  $1021 \pm 153$  pg/ml and mean 6 MWT values were  $300 \pm 26$  m. NYHA improved by at least 1 functional class. Mean LA-volume after 6 months of follow-up was  $104.5 \pm 18$  ml.

**Conclusions:** CCM is an effective and safe technology for patients with symptomatic HF. It significantly improves functional parameters, including a 6-minute walk test and NYHA functional class. CCM may prevent HF progression and may influence the outcome.
